# Supplementary material for: Flipping of the coordinated triazine moiety in Cu(i)–L2and the small electronic factor, κel, for direct outer-sphere cross reactions: syntheses, crystal structures and redox behaviour of copper(ii)/(i)–L2complexes (L = 3-(2-pyridyl)-5,6-diphenyl-1,2,4-triazine)
Source: Royal Society of Chemistry journal article supplement (doi:10.1039/c5dt01808k), 2015-01-01

Supplementary Figure S1. NMR spectra of  $[\text{Cu}(\text{pdt})_2]^+$  at room temperature (top) and at  $-30^\circ\text{C}$  (bottom).

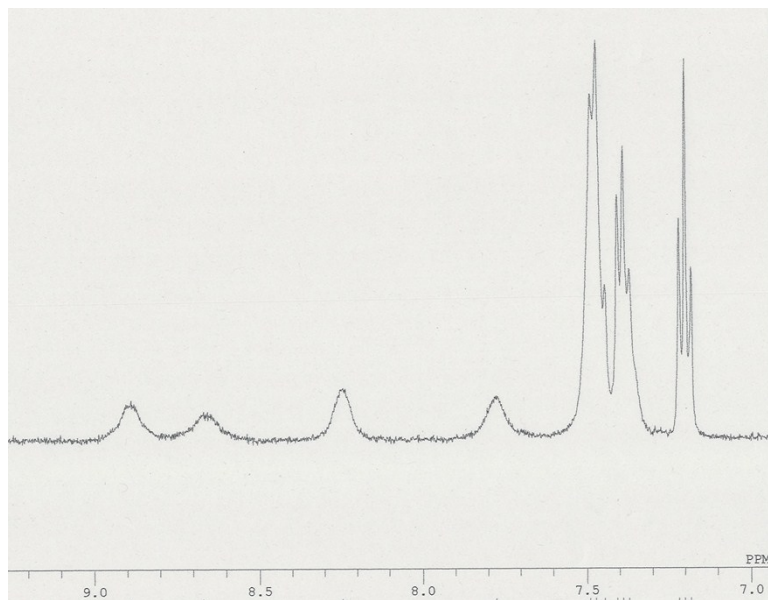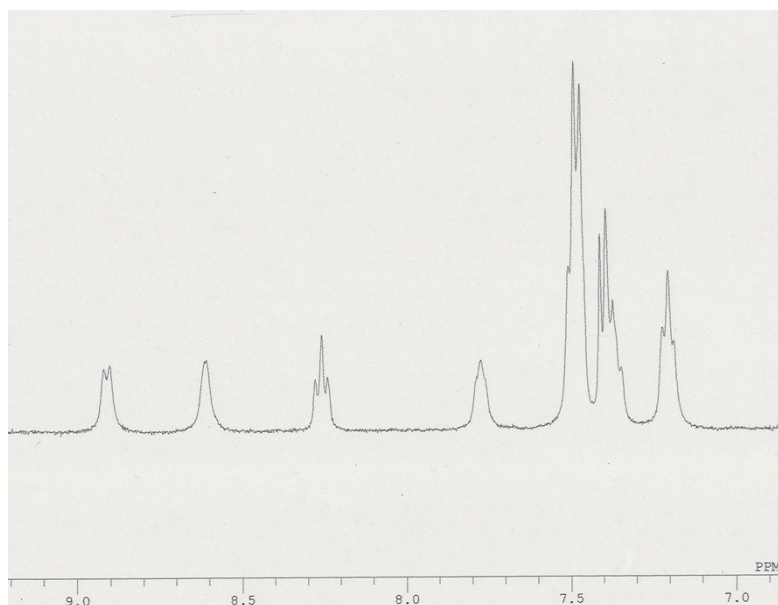

Supplement: c5dt01808k1.pdf [file c5dt01808k1.pdf]
