# Supplementary material for: Flipping of the coordinated triazine moiety in Cu(i)–L2and the small electronic factor, κel, for direct outer-sphere cross reactions: syntheses, crystal structures and redox behaviour of copper(ii)/(i)–L2complexes (L = 3-(2-pyridyl)-5,6-diphenyl-1,2,4-triazine)
Source: Royal Society of Chemistry journal article supplement (doi:10.1039/c5dt01808k), 2015-01-01
Supplement: c5dt01808k2.pdf [file c5dt01808k2.pdf]

Supplementary Table S1. Dependence of the Line Width of Proton Signals of  $[\text{Cu}(\text{pdt})_2]^+$  on the Concentration of  $[\text{Cu}(\text{pdt})_2^{2+}]$  in Acetonitrile- $d_3$

| $T/\text{K}$ | $\nu_{\text{Cu}(\text{I})} / \text{Hz}$ | $\nu_{\sigma\alpha\mu\pi\lambda\varepsilon} / \text{Hz}$ | $\pi\Delta\nu / \text{s}^{-1}$ | $k_{\text{ex}} / \text{kg mol}^{-1} \text{s}^{-1}$ |
|--------------|-----------------------------------------|----------------------------------------------------------|--------------------------------|----------------------------------------------------|
| 297.8        | 25.6                                    | 33.5                                                     | 24.8                           | 99200                                              |
| 282.9        | 22.1                                    | 25.7                                                     | 11.3                           | 45200                                              |
| 272.9        | 20.7                                    | 22.9                                                     | 6.91                           | 27600                                              |
| 263.0        | 19.7                                    | 20.3                                                     | 1.88                           | 7540                                               |

Errors of  $k_{\text{ex}}$  were typically  $\pm 5\%$ .

$[\text{Cu}(\text{pdt})_2^+] = 9.10 \text{ mmol/kg}$ .  $[\text{Cu}(\text{pdt})_2^{2+}] = 0.25 \text{ mmol/kg}$ .

Supplementary Table S2. Dependence of the Line Width of Proton Signals of  $[\text{Cu}(\text{pdt})_2]^+$  on Temperature in acetonitrile- $d_3$

| $T / \text{K}$ | $k / \text{s}^{-1}$ |
|----------------|---------------------|
| 297.8          | $51 \pm 5$          |
| 282.9          | $42 \pm 4$          |
| 272.9          | $35 \pm 3$          |
| 263.0          | $33 \pm 3$          |

$[\text{Cu}(\text{pdt})_2^+] = 9.10 \text{ mmol/kg}$ .

Supplementary Table S3. Observed rate constants for the reduction reaction of  $[\text{Cu}(\text{pdt})_2]^{2+}$  by decamethylferrocene in acetonitrile

| $T / \text{K}$ | $10^4 [\text{decamethylferrocene}] / \text{mol kg}^{-1}$ | $k_{\text{obs}} / \text{s}^{-1}$ |
|----------------|----------------------------------------------------------|----------------------------------|
| 278.2          | 0.164                                                    | $3.98 \pm 0.21$                  |
|                | 0.168                                                    | $6.24 \pm 0.31$                  |
|                | 0.224                                                    | $7.48 \pm 0.22$                  |
|                | 0.260                                                    | $8.37 \pm 0.44$                  |
|                | 0.292                                                    | $11.1 \pm 0.5$                   |
|                | 0.446                                                    | $14.9 \pm 0.4$                   |
|                | 0.479                                                    | $18.7 \pm 0.7$                   |

---

|       |       |             |
|-------|-------|-------------|
|       | 0.481 | 18.5 ± 0.5  |
|       | 0.657 | 27.3 ± 0.9  |
|       | 0.708 | 27.3 ± 0.7  |
|       | 0.989 | 34.0 ± 0.3  |
|       | 1.03  | 35.7 ± 0.6  |
|       | 1.05  | 36.7 ± 0.6  |
|       | 1.06  | 35.7 ± 1.2  |
|       | 1.12  | 38.5 ± 0.8  |
|       | 1.45  | 46.2 ± 1.1  |
|       | 1.51  | 54.1 ± 0.7  |
|       | 1.89  | 62.7 ± 1.0  |
|       | 2.03  | 69.6 ± 1.1  |
|       | 2.41  | 85.1 ± 1.8  |
|       | 2.88  | 100 ± 2     |
|       | 2.97  | 96.2 ± 1.8  |
|       | 3.38  | 123 ± 2     |
|       | 4.11  | 139 ± 2     |
|       | <hr/> |             |
| 283.2 | 0.164 | 7.60 ± 0.25 |
|       | 0.168 | 9.61 ± 0.31 |
|       | 0.224 | 10.0 ± 0.4  |
|       | 0.252 | 11.1 ± 1.6  |
|       | 0.260 | 11.8 ± 0.4  |
|       | 0.292 | 14.9 ± 0.3  |
|       | 0.444 | 22.0 ± 0.8  |
|       | 0.446 | 22.0 ± 0.5  |
|       | 0.479 | 23.1 ± 0.5  |
|       | 0.657 | 34.9 ± 0.8  |
|       | 0.696 | 35.3 ± 1.4  |
|       | 0.708 | 36.8 ± 0.8  |
|       | 0.928 | 45.6 ± 2.7  |
|       | 0.989 | 46.7 ± 1.2  |
|       | 1.03  | 48.4 ± 0.7  |

---

---

|       |       |            |
|-------|-------|------------|
|       | 1.05  | 47.1 ± 0.7 |
|       | 1.12  | 52.5 ± 0.7 |
|       | 1.45  | 65.1 ± 1.4 |
|       | 1.51  | 66.7 ± 0.7 |
|       | 1.89  | 86.8 ± 1.4 |
|       | 2.03  | 89.0 ± 1.9 |
|       | 2.41  | 109 ± 2    |
|       | 2.88  | 128 ± 2    |
|       | 2.97  | 131 ± 3    |
| 288.2 | 0.164 | 10.3 ± 0.6 |
|       | 0.168 | 11.9 ± 0.4 |
|       | 0.224 | 13.3 ± 0.5 |
|       | 0.252 | 16.9 ± 1.4 |
|       | 0.260 | 18.7 ± 0.5 |
|       | 0.292 | 21.7 ± 0.7 |
|       | 0.444 | 27.7 ± 1.6 |
|       | 0.446 | 28.2 ± 0.7 |
|       | 0.479 | 33.2 ± 0.5 |
|       | 0.481 | 34.0 ± 1.1 |
|       | 0.657 | 45.1 ± 0.4 |
|       | 0.696 | 44.1 ± 2.6 |
|       | 0.708 | 46.8 ± 0.5 |
|       | 0.928 | 60.6 ± 1.5 |
|       | 0.989 | 58.3 ± 0.8 |
|       | 1.03  | 58.4 ± 1.0 |
|       | 1.05  | 64.6 ± 1.4 |
|       | 1.06  | 65.7 ± 0.6 |
|       | 1.12  | 70.1 ± 0.7 |
|       | 1.45  | 84.6 ± 0.6 |
|       | 1.51  | 86.8 ± 2.3 |
|       | 1.89  | 111 ± 1    |
|       | 2.03  | 119 ± 2    |

---

|      |         |
|------|---------|
| 2.41 | 138 ± 1 |
| 2.88 | 163 ± 2 |
| 2.97 | 174 ± 2 |
| 3.38 | 187 ± 2 |

[Cu(pdt)<sub>2</sub><sup>2+</sup>] = 1 × 10<sup>-5</sup> mol kg<sup>-1</sup>, I = 0.3 mol kg<sup>-1</sup> (TBABF<sub>4</sub>), λ = 350 nm.

Supplementary TableS4. Observed rate constants for oxidation reaction of [Cu(pdt)<sub>2</sub>]<sup>+</sup> by [Co(bpy)<sub>3</sub>]<sup>3+</sup> in acetonitrile

| T / K | 10 <sup>3</sup> [Co(bpy) <sub>3</sub> <sup>3+</sup> ] / mol kg <sup>-1</sup> | k <sub>obs</sub> / s <sup>-1</sup> |
|-------|------------------------------------------------------------------------------|------------------------------------|
| 288.2 | 0.613                                                                        | 0.850                              |
|       | 0.770                                                                        | 0.872                              |
|       | 1.38                                                                         | 1.36                               |
|       | 1.40                                                                         | 1.38                               |
|       | 1.48                                                                         | 1.35                               |
|       | 1.61                                                                         | 1.57                               |
|       | 1.90                                                                         | 1.63                               |
|       | 2.25                                                                         | 1.79                               |
|       | 2.72                                                                         | 1.82                               |
|       | 2.82                                                                         | 1.87                               |
| 293.2 | 3.09                                                                         | 2.10                               |
|       | 0.504                                                                        | 0.935                              |
|       | 0.740                                                                        | 1.14                               |
|       | 0.941                                                                        | 1.26                               |
|       | 1.54                                                                         | 1.69                               |
|       | 1.84                                                                         | 2.08                               |
|       | 2.16                                                                         | 2.12                               |
|       | 2.41                                                                         | 2.27                               |
|       | 2.82                                                                         | 2.51                               |
|       | 2.90                                                                         | 2.58                               |
|       | 0.463                                                                        | 1.10                               |

---

|       |       |      |
|-------|-------|------|
|       | 0.803 | 1.35 |
|       | 1.66  | 2.19 |
| 298.2 | 1.84  | 2.71 |
|       | 2.19  | 2.66 |
|       | 2.57  | 3.04 |
|       | 3.43  | 3.53 |

---

$[\text{Cu}(\text{pdt})_2^{2+}] = 1 \times 10^{-4} \text{ mol kg}^{-1}$ ,  $I = 0.1 \text{ mol kg}^{-1}$  (TBAPF<sub>6</sub>),  $\lambda = 500\text{nm}$ .
